# Supplementary material
Source: PubMed Central journal article supplement (PMC2763944)
Supplement: NIHMS143764-supplement-01.pdf [file NIHMS143764-supplement-01.pdf]

Figure S1

| Character number                                                         | yes                                                                                           | no                                                                                            | <i>C. elegans</i> (RNAi)                                                                                |
|--------------------------------------------------------------------------|-----------------------------------------------------------------------------------------------|-----------------------------------------------------------------------------------------------|---------------------------------------------------------------------------------------------------------|
| 1. Does the membrane ruffle during the 1-cell stage?                     | 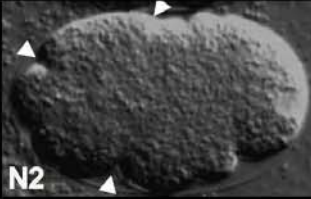<br>N2        | <br>SB347    | <br>B0348.6(RNAi)     |
| 2. Is asymmetric smoothing of the membrane occurring before NEBD?        | <br>N2       | <br>JB122   | <br>Y82E9BR.15(RNAi) |
| 3. Is at least one PB seen in the anterior?                              | <br>N2       | <br>DF5010  | <br>F35D6.1(RNAi)    |
| 4. Is at least one PB seen in the middle?                                | <br>DF5020   | <br>N2      | <br>C47E12.1(RNAi)   |
| 5. Is at least one PB seen in the posterior?                             | <br>DF5006  | <br>N2     | <br>C08B11.1        |
| 6. Are there 2 obvious pronuclei present?                                | <br>N2     | <br>JB122 | <br>C41G7.2(RNAi)  |
| 7. Do centrosome-like structures initially appear away from the nucleus? | <br>PS1179 | <br>N2    | <br>F57B1.2(RNAi)  |
| 8. Is a PC present?                                                      | <br>N2     | <br>SB328 | <br>C34C12.3(RNAi) |
| 9. Does the PC persist beyond pronuclear meeting?                        | <br>PS312  | <br>N2    | <br>T19A5.2(RNAi)  |
| 10. Does the formed PC significantly change its location?                | <br>PS312  | <br>N2    | <br>K09H11.3(RNAi) |

Figure S1, cont.

| Character number                                                                             | yes                                                                                           | no                                                                                            | <i>C. elegans</i> (RNAi)                                                                                 |
|----------------------------------------------------------------------------------------------|-----------------------------------------------------------------------------------------------|-----------------------------------------------------------------------------------------------|----------------------------------------------------------------------------------------------------------|
| 11. Do cytoplasmic yolk granules stream to the posterior?                                    | 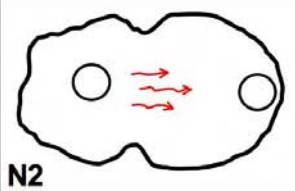<br>N2        | <br>DF5006   | <br>C37A2.4(RNAi)      |
| 12. Do posterior cortical granules move anteriorly?                                          | <br>N2       | <br>DF5010  | <br>B0348.6(RNAi)     |
| 13. Does the ant. pronucleus migrate across most of the cell to meet the post. one?          | <br>N2       | <br>DF5018  | <br>Y54E2A.3(RNAi)    |
| 14. Does the posterior pronucleus migrate to meet the anterior one in the center?            | <br>SB347    | <br>N2      | <br>K08E3.6(RNAi)     |
| 15. Are there cytopl. areas devoid of yolk granules at the 1-cell stage?                     | <br>SB202   | <br>N2     | <br>F25B5.4(RNAi)    |
| 16. Are there cytopl. areas devoid of yolk granules at the 2-cell stage?                     | <br>DF5019 | <br>N2    | <br>B03336.10(RNAi) |
| 17. Do the pronuclei meet close to the posterior end?                                        | <br>N2     | <br>SB347 | <br>W08F4.8(RNAi)   |
| 18. Is NEBD in the center of the 1-cell embryo?                                              | <br>N2     | <br>SB303 | <br>Y53F4B.22(RNAi) |
| 19. Does NEBD occur when the spindle reaches the final location and orientation for mitosis? | <br>N2     | <br>PS312 | <br>F58B6.3(RNAi)   |
| 20. Is there a nuclear rotation at the one-cell stage?                                       | <br>N2     | <br>SB328 | <br>ZK593.5 (RNAi)  |

Figure S1, cont.

| Character number                                                                            | yes                                                                                           | no                                                                                             | <i>C. elegans</i> (RNAi)                                                                                |
|---------------------------------------------------------------------------------------------|-----------------------------------------------------------------------------------------------|------------------------------------------------------------------------------------------------|---------------------------------------------------------------------------------------------------------|
| 21. Do displacements of the one-cell stage spindle occur (horizontally or vertically)?      | 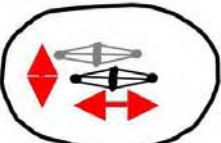<br>DF5022   | <br>N2       | <br>F13B10.2(RNAi)   |
| 22. Does the anterior pole of the spindle rock?                                             | <br>DF5020   | <br>N2       | <br>F10C2.4(RNAi)    |
| 23. Does the posterior pole of the spindle rock?                                            | <br>N2       | <br>SB347    | <br>C38C10.4(RNAi)   |
| 24. Is there an asymmetric first division?                                                  | <br>N2       | <br>DF5019   | <br>F54E7.3(RNAi)    |
| 25. Do the centrosomes have different shapes after cytokinesis?                             | <br>N2      | <br>SB328   | <br>T09A5.10(RNAi)  |
| 26. Do either nuclei of the AB or P <sub>1</sub> cell show obvious movements after mitosis? | <br>N2     | <br>PS312  | <br>B0035.8(RNAi)  |
| 27. Do the AB and P <sub>1</sub> nuclei touch the cytokinesis plane?                        | <br>DF5006 | <br>N2     | <br>F35G12.8(RNAi) |
| 28. Is the AB and P <sub>1</sub> nucleus always of spherical shape and a single entity?     | <br>N2     | <br>DF5018 | <br>T23H2.1(RNAi)  |
| 29. Are nucleoli visible at the 2-cell stage?                                               | <br>JB122  | <br>N2     | <br>ZK112.2(RNAi)  |
| 30. Are there large vacuoles observable at the two-cell stage?                              | <br>DF5024 | <br>N2     | <br>C56C10.3(RNAi) |

Figure S1, cont.

| Character number                                                                   | yes                                                                                        | no                                                                                          | <i>C. elegans</i> (RNAi)                                                                             |
|------------------------------------------------------------------------------------|--------------------------------------------------------------------------------------------|---------------------------------------------------------------------------------------------|------------------------------------------------------------------------------------------------------|
| 31. Is there obvious ruffling at the 2-cell stage in either cell?                  | 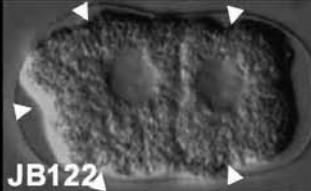 JB122     |  DF5019    |  B0348.6(RNAi)     |
| 32. Does one cell ruffle more than the other at the 2-cell stage?                  |  DF5006   |  JB122    |  C26E6.8(RNAi)    |
| 33. Are there PC-like constrictions at the 2-cell stage?                           |  DF5010   |  N2       |  Y46G5A.31(RNAi)  |
| 34. Are the second divisions clearly asynchronous (> 30 seconds)?                  |  N2       |  DF5020   |  H39E23.1(RNAi)   |
| 35. Does the larger (anterior) cell divide first?                                  |  N2      |  JB122   |  T06E6.2(RNAi)   |
| 36. Is the AB spindle oriented perpendicular to the long axis of the embryo?       |  N2     |  JB122  |  F54E7.3(RNAi)  |
| 37. Is the P <sub>1</sub> spindle oriented along the long axis of the embryo?      |  N2     |  DF5019 |  F58B6.3(RNAi)  |
| 38. Is the forming P <sub>2</sub> cell immediately in contact with the AB lineage? |  N2     |  SB328  |  C29A12.3(RNAi) |
| 39. Does the AB spindle rock?                                                      |  CB5161 |  N2     |  Y56A3A.1(RNAi) |
| 40. Does the P <sub>1</sub> spindle rock?                                          |  N2     |  JU727  |  C26B2.1(RNAi)  |

***Figure S1: Complete list of the 40 binary characters used for the phenotypic analysis of early embryogenesis and comparisons with RNAi experiments in C. elegans.***

For every character, examples are given for both character states. All species that differ from *C. elegans* show the same phenotype. Cartoons illustrate the more dynamic characters that are difficult to represent in a single DIC image. (Movies representing all character states can be viewed on [www.rhevolution.org](http://www.rhevolution.org).) The last column gives an example of an RNAi experiment in *C. elegans* that phenocopies the character state seen in the other species (pictures taken from [phenobank.org](http://phenobank.org) or [RNAi.org](http://RNAi.org)). Due to the inherent differences in RNAi penetrance, the RNAi phenotypes reported here are not necessarily seen in all published RNAi experiments and are seen in only a subset of the reported cases.

Symbols: Characters (1, 2, 31, 32) arrowheads: ruffling events; (2) white line: smooth part of the membrane; (3, 4, 5) arrowheads: polar bodies; (7) arrows: centrosome-like structures; (8, 9) arrowheads: PC; (10) white arrowheads: initial position of PC, red arrowheads: final position of PC; (11, 12) arrows: direction of yolk stream, small lines: undirected minor yolk movements; (13, 14) dotted red circle: location of the pronucleus before migration, solid red circle: position of the pronucleus after migration, red arrows: major movements; (15, 16) arrowheads: cytoplasmic areas devoid of yolk granules; (17) white line: middle of the embryo, red line: point where pronuclei meet; (18) white line: middle of the embryo, red line: position of NEBD; (19) white line: location and orientation of spindle at beginning of NEBD; (20) red arrow: rotation of nuclear complex

from position indicated with dotted outline to position shown in solid outline; black arrow: change in position of nuclear complex; (21) red arrows: movements of spindle, two different positions of the spindle are indicated in black and grey; (22, 23) red arrows: movements of spindle poles, two different positions of the spindle are indicated in black and grey; (24) white line: long axis of the embryo with middle marked by tick, red line: actual position of the division; (26) red arrowheads: position of the nuclei immediately after mitosis, white arrowheads: final position of the nuclei; (27) arrowheads: part of the nucleus closest to the cytokinesis plane; (28) arrowheads: areas where nuclei have non-spherical shape; (29) arrowheads: nucleoli; (30) arrowheads: vacuoles; (33) arrowheads: PC-like constrictions; (34) arrowheads: beginning of cytokinesis; (35) arrowheads: cell that divides first; (36, 37) white lines: spindle orientation (38) red arrow: contact between P2 and ABp, white arrows: lack of contact between these cells right after cell division; (39, 40) red arrows: spindle movements.
