# Supplementary material
Source: PubMed Central journal article supplement (PMC2763944)
Supplement: NIHMS143764-supplement-02.pdf [file NIHMS143764-supplement-02.pdf]

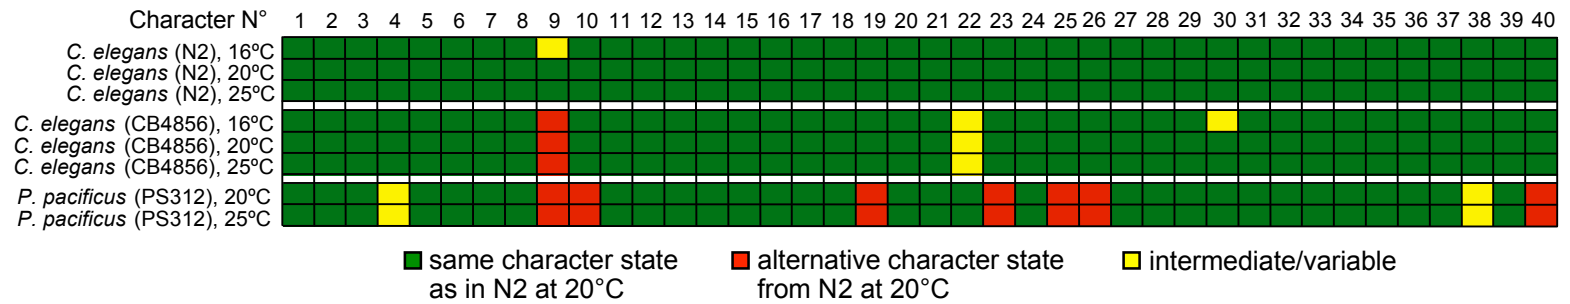

**Figure S2: Species signatures of *C. elegans* strains N2 and CB4856 grown for 10 generations either at 16, 20, or 25°C and of *Pristionchus pacificus* grown at 20 and 25°C.**

The expression of most characters in the rhabditid character set is not affected by temperature. There are two exceptions in which a character becomes "intermediate/variable" at lower temperature (character 9 in N2 and character 30 in CB4856). In addition, the state in character 9 differs between the two *C. elegans* strains.
