# Supplementary material
Source: PubMed Central journal article supplement (PMC2763944)
Supplement: NIHMS143764-supplement-03.pdf [file NIHMS143764-supplement-03.pdf]

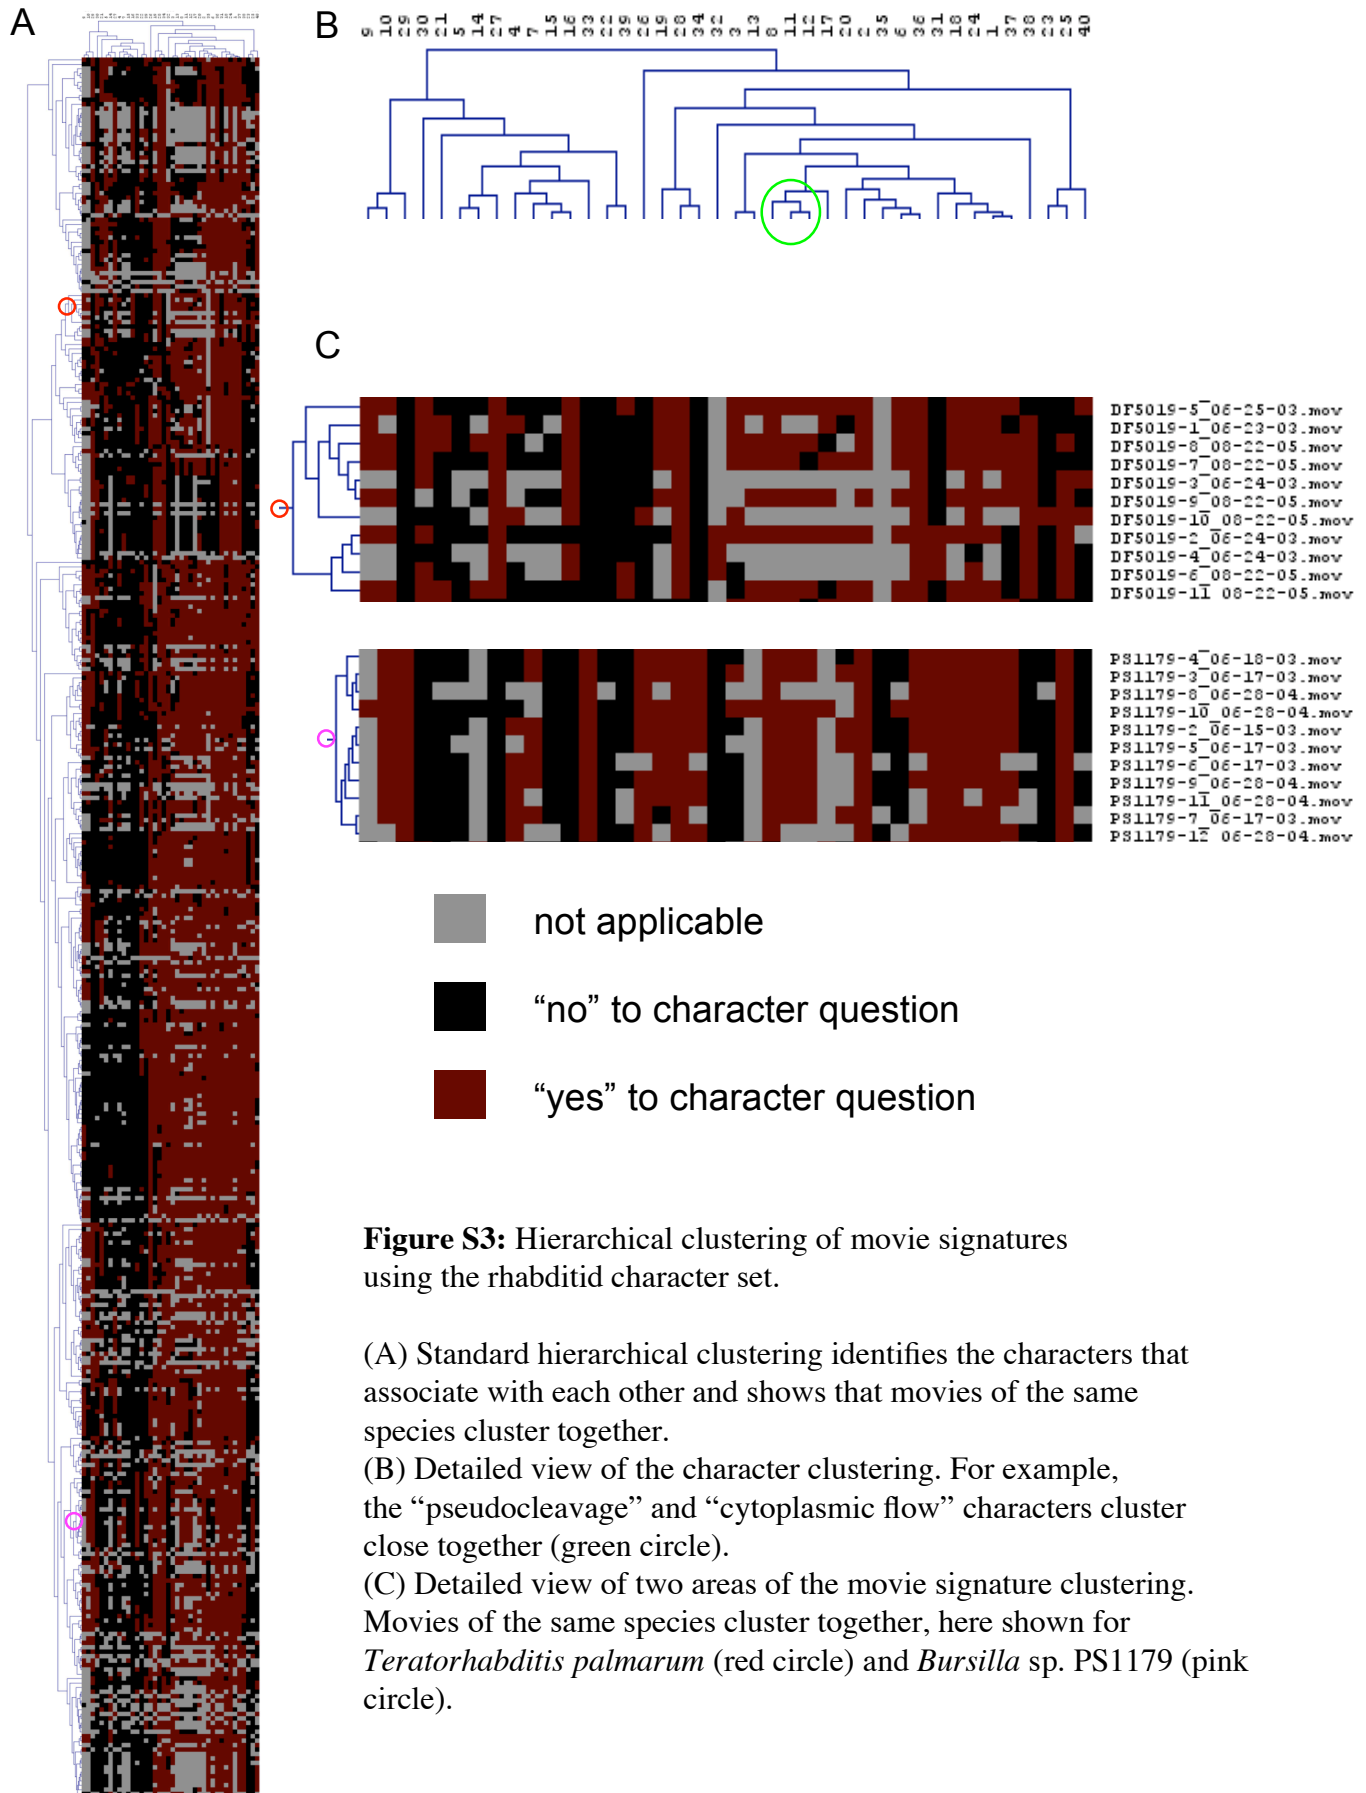

**Figure S3:** Hierarchical clustering of movie signatures using the rhabditid character set.

(A) Standard hierarchical clustering identifies the characters that associate with each other and shows that movies of the same species cluster together.

(B) Detailed view of the character clustering. For example, the “pseudocleavage” and “cytoplasmic flow” characters cluster close together (green circle).

(C) Detailed view of two areas of the movie signature clustering. Movies of the same species cluster together, here shown for *Teratorhabditis palmarum* (red circle) and *Bursilla* sp. PS1179 (pink circle).
