# Supplementary material
Source: PubMed Central journal article supplement (PMC2763944)
Supplement: NIHMS143764-supplement-05.pdf [file NIHMS143764-supplement-05.pdf]

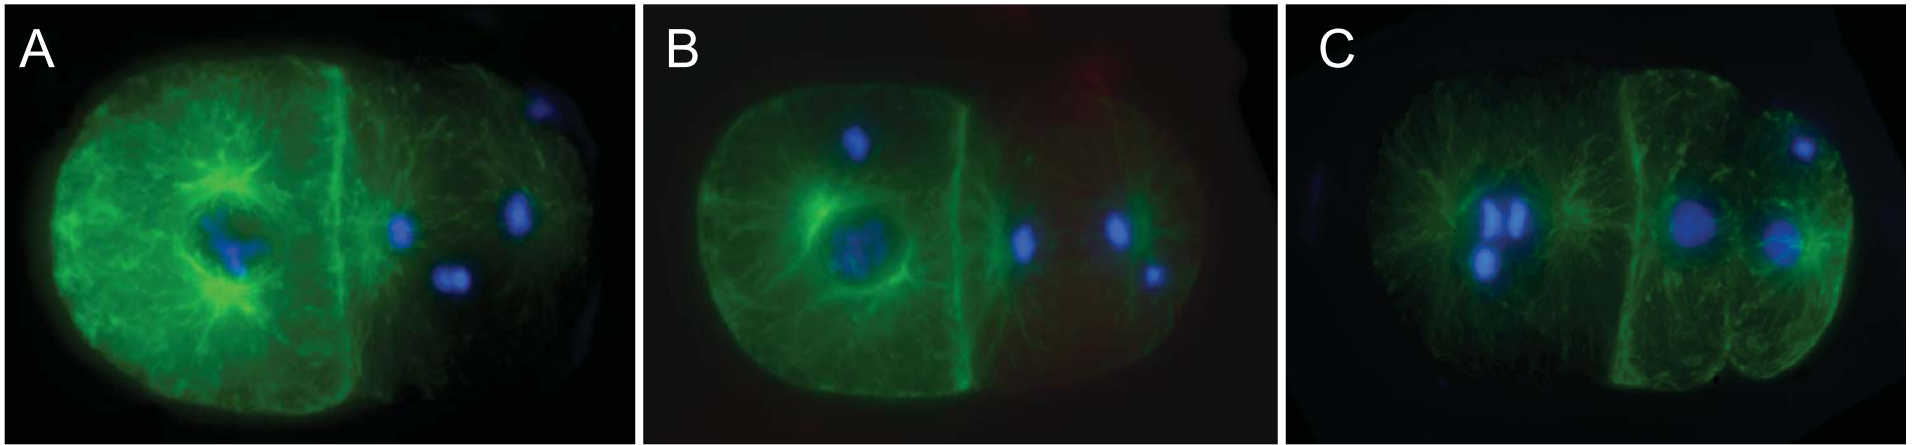

**Figure S5 Tubulin staining confirms AB spindle rotation in *Protorhabditis* sp. (JB122).**

AB cell before (A), during (B) and after (C) spindle rotation. Tubulin in green, DNA in blue.
