# Supplementary material
Source: PubMed Central journal article supplement (PMC2763944)
Supplement: NIHMS143764-supplement-06.pdf [file NIHMS143764-supplement-06.pdf]

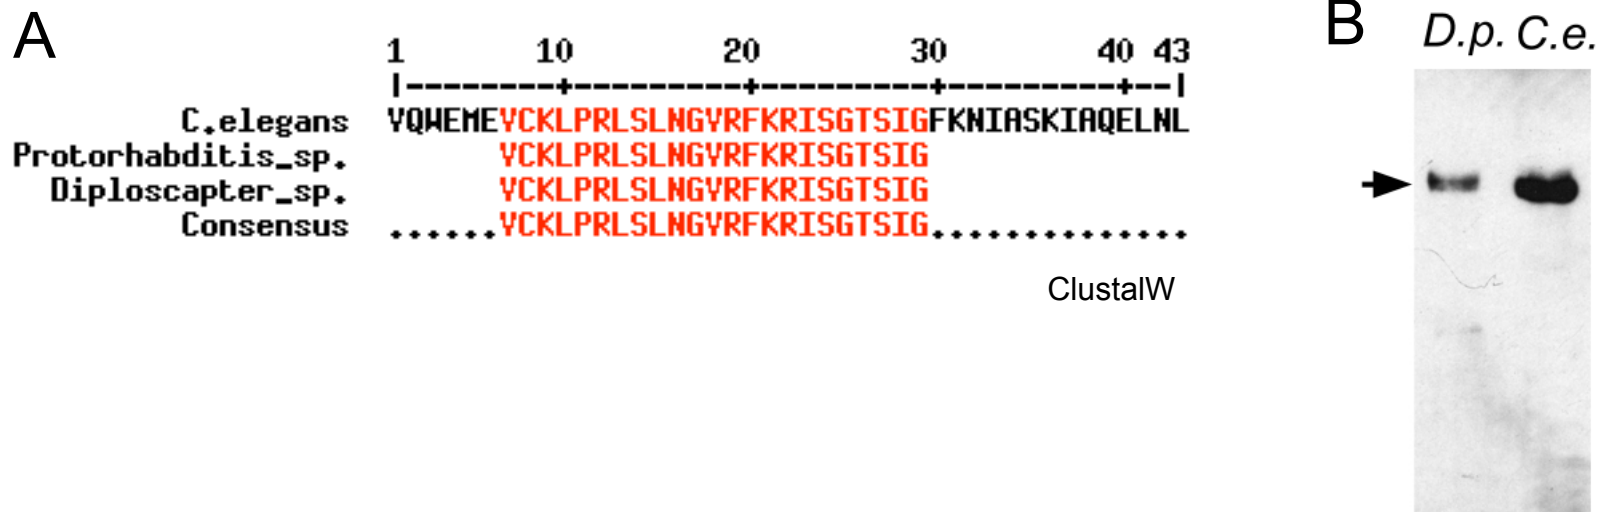

**Figure S6.** The antibody raised against *C. elegans* PAR-1 crossreacts in other species.

(A) Alignment of the protein sequence from *C. elegans*, *Protorhabditis* sp. (JB122, GenBank accession number GQ205454) and *Diploscapter* sp. (JU359, GenBank accession number GQ205455) which is recognized by the antibody. (B) A band of similar size in *C. elegans* and *Diploscapter* sp. (JU359) is seen in a western blot with anti-PAR-1, suggesting that the antibody recognizes homologous proteins in both species.
