# Supplementary material
Source: PubMed Central journal article supplement (PMC2763944)
Supplement: NIHMS143764-supplement-07.pdf [file NIHMS143764-supplement-07.pdf]

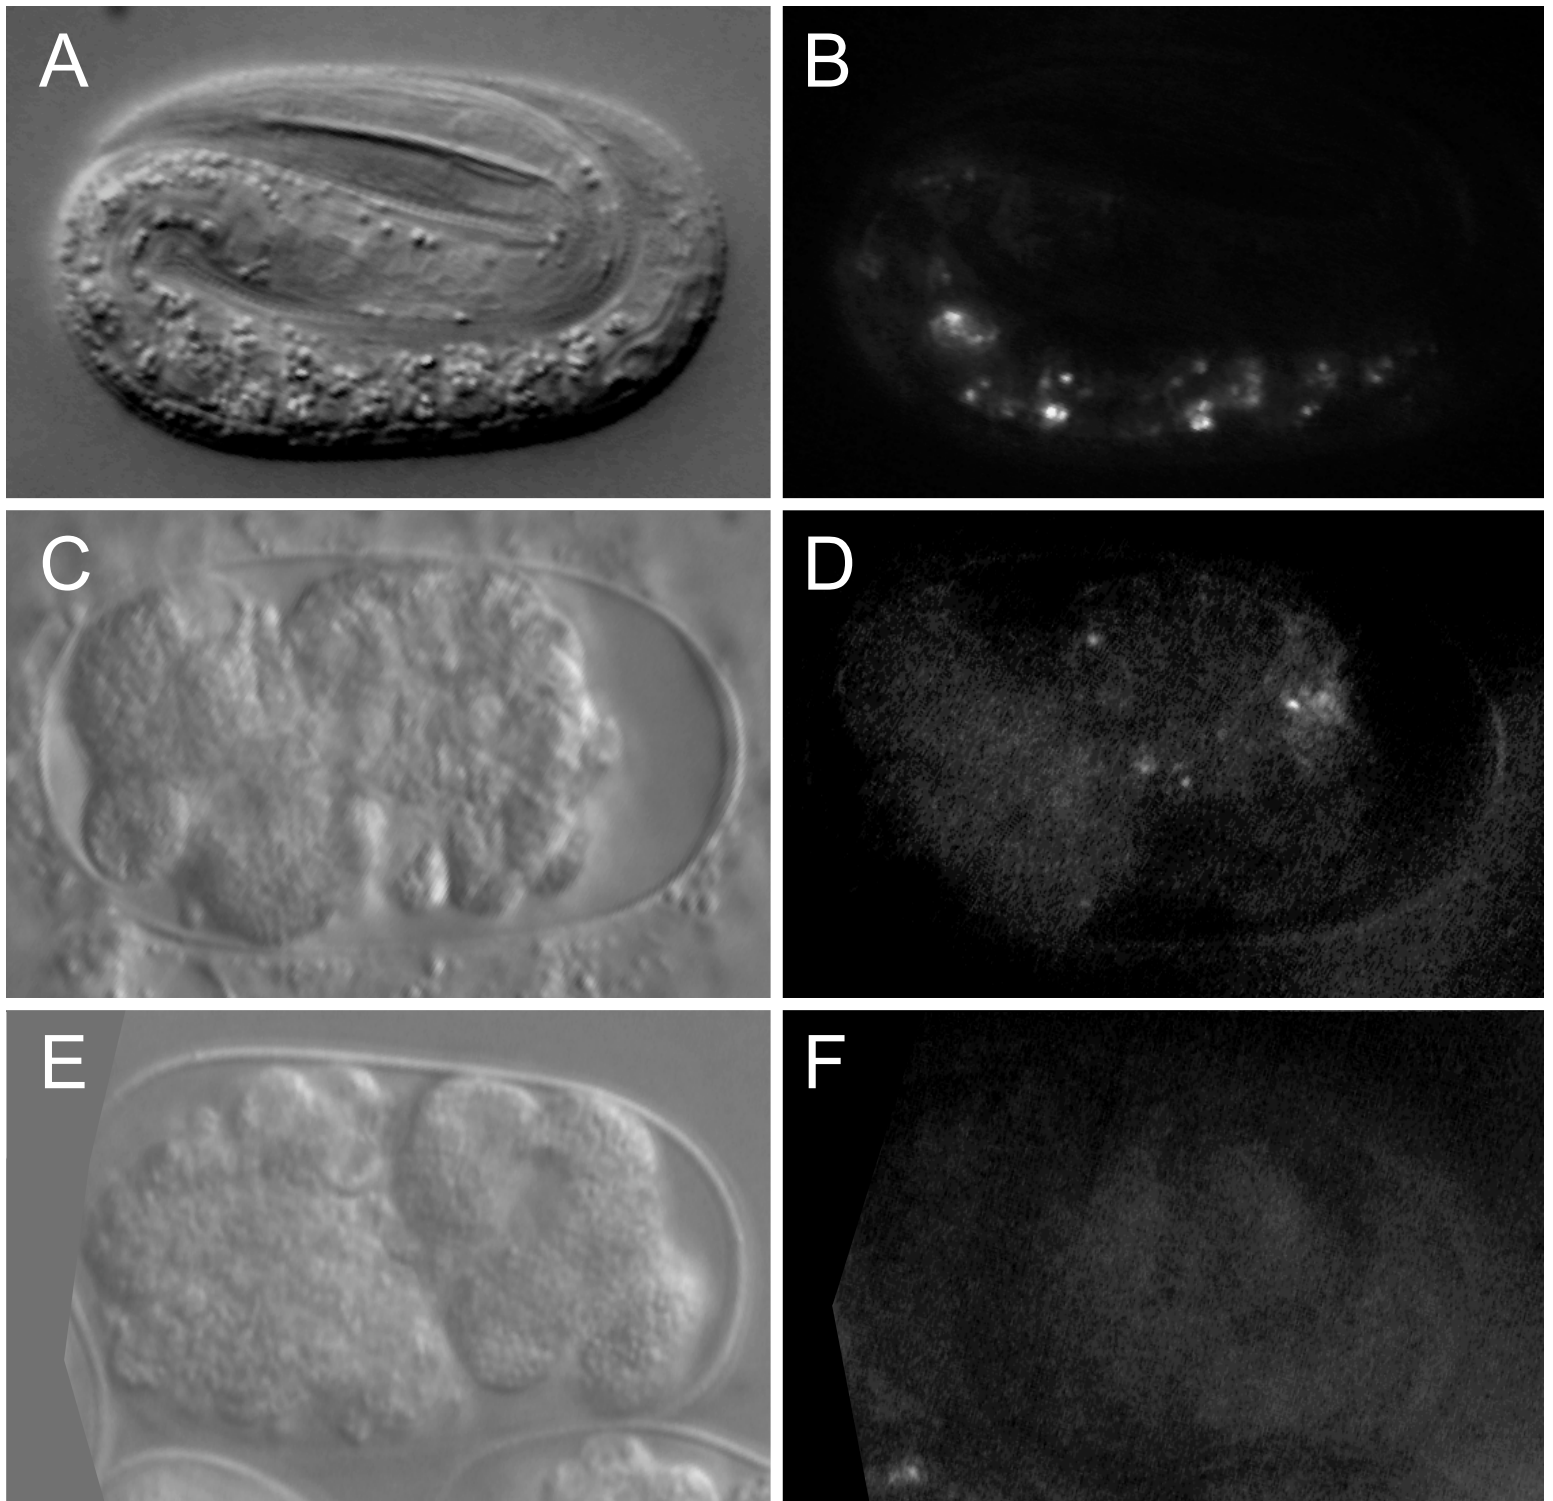

**Figure S7:** Laser ablation experiments show that in *Protorhabditis* sp. (JB122) the gut lineage is produced exclusively by  $P_1$ .
