# Supplementary material
Source: PubMed Central journal article supplement (PMC2763944)
Supplement: NIHMS143764-supplement-08.pdf [file NIHMS143764-supplement-08.pdf]

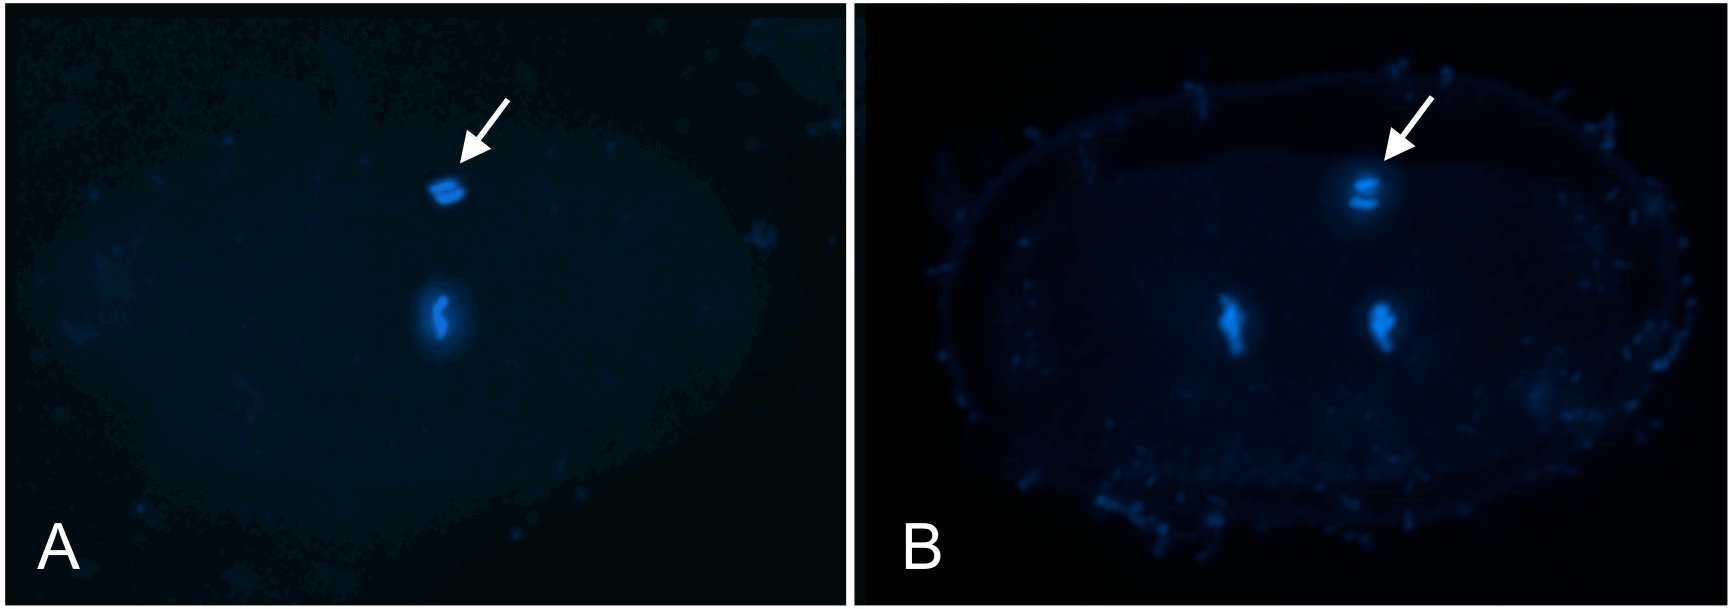

**Figure S8: DAPI staining shows polar bodies in the middle of *Diploscapter* sp. (JU359) one-cell stage embryos.**

Embryo during metaphase (A) and anaphase (B). DNA is shown in blue. Arrows point to polar bodies.
