# Supplementary material
Source: PubMed Central journal article supplement (PMC2763944)
Supplement: NIHMS143764-supplement-09.pdf [file NIHMS143764-supplement-09.pdf]

|                       |                       |                       |                       |                       |                       |                       |                       |                       |                        |                        |                        |           |                  |            |      |      |      |      |      |      |      |      |      |      |      |      |      |      |      |      |      |      |      |      |      |      |      |      |      |      |      |      |      |      |      |      |      |
|-----------------------|-----------------------|-----------------------|-----------------------|-----------------------|-----------------------|-----------------------|-----------------------|-----------------------|------------------------|------------------------|------------------------|-----------|------------------|------------|------|------|------|------|------|------|------|------|------|------|------|------|------|------|------|------|------|------|------|------|------|------|------|------|------|------|------|------|------|------|------|------|------|
| 1                     | 2                     | 3                     | 4                     | 5                     | 6                     | 7                     | 8                     | 9                     | 10                     | 11                     | 12                     | 13        | 14               | 15         | 16   | 17   | 18   | 19   | 20   | 21   | 22   | 23   | 24   | 25   | 26   | 27   | 28   | 29   | 30   | 31   | 32   | 33   | 34   | 35   | 36   | 37   | 38   | 39   | 40   |      |      |      |      |      |      |      |      |
| 1.00                  | 1.00                  | 0.67                  | 0.00                  | 0.33                  | 1.00                  | 0.00                  | 0.88                  | 0.33                  | 1.00                   | 0.00                   | 0.88                   | 0.25      | 0.00             | 0.80       | 0.80 | 0.00 | 0.80 | 0.67 | 0.88 | 0.25 | 0.00 | 0.22 | 0.23 | 1.00 | 0.00 | 0.22 | 0.23 | 1.00 | 0.33 | 0.83 | 0.67 | 0.25 | 0.67 | 1.00 | 0.00 | 0.38 | 0.00 | 0.15 | 1.00 | 0.00 | 0.69 | 0.89 | 1.00 | 1.00 | 0.77 | 0.69 | 0.69 |
| DF5012-1_06-12-03.mov | DF5012-2_06-15-03.mov | DF5012-3_06-15-03.mov | DF5012-4_06-15-03.mov | DF5012-5_06-15-03.mov | DF5012-6_06-15-03.mov | DF5012-7_06-15-03.mov | DF5012-8_06-15-03.mov | DF5012-9_06-17-05.mov | DF5012-10_08-17-05.mov | DF5012-11_08-17-05.mov | DF5012-12_08-17-05.mov | frequency | DF5012 signature | datapoints |      |      |      |      |      |      |      |      |      |      |      |      |      |      |      |      |      |      |      |      |      |      |      |      |      |      |      |      |      |      |      |      |      |

|                       |                       |                       |                       |                       |                       |                       |                       |                       |                        |                        |                        |                        |           |                  |            |      |      |      |      |      |      |      |      |      |      |      |      |      |      |      |      |      |      |      |      |      |      |      |      |      |
|-----------------------|-----------------------|-----------------------|-----------------------|-----------------------|-----------------------|-----------------------|-----------------------|-----------------------|------------------------|------------------------|------------------------|------------------------|-----------|------------------|------------|------|------|------|------|------|------|------|------|------|------|------|------|------|------|------|------|------|------|------|------|------|------|------|------|------|
| 1                     | 2                     | 3                     | 4                     | 5                     | 6                     | 7                     | 8                     | 9                     | 10                     | 11                     | 12                     | 13                     | 14        | 15               | 16         | 17   | 18   | 19   | 20   | 21   | 22   | 23   | 24   | 25   | 26   | 27   | 28   | 29   | 30   | 31   | 32   | 33   | 34   | 35   | 36   | 37   | 38   | 39   | 40   |      |
| 1.00                  | 1.00                  | 0.40                  | 0.60                  | 0.40                  | 1.00                  | 0.00                  | 0.89                  | 1.00                  | 1.00                   | 1.00                   | 0.75                   | 0.20                   | 0.00      | 0.22             | 0.23       | 1.00 | 0.33 | 0.83 | 0.67 | 0.25 | 0.67 | 1.00 | 0.00 | 0.15 | 1.00 | 0.00 | 0.15 | 1.00 | 0.25 | 1.00 | 0.77 | 0.00 | 0.69 | 0.89 | 1.00 | 1.00 | 1.00 | 0.77 | 0.69 | 0.69 |
| DF5018-1_05-28-03.mov | DF5018-2_05-29-03.mov | DF5018-3_05-29-03.mov | DF5018-4_05-29-03.mov | DF5018-5_05-30-03.mov | DF5018-6_07-01-05.mov | DF5018-7_07-01-05.mov | DF5018-8_07-01-05.mov | DF5018-9_07-03-05.mov | DF5018-10_07-03-05.mov | DF5018-11_07-03-05.mov | DF5018-12_07-03-05.mov | DF5018-13_07-03-05.mov | frequency | DF5018 signature | datapoints |      |      |      |      |      |      |      |      |      |      |      |      |      |      |      |      |      |      |      |      |      |      |      |      |      |

|                       |                       |                       |                       |                       |                       |                       |                       |                       |                        |                        |           |                  |            |      |      |      |      |      |      |      |      |      |      |      |      |      |      |      |      |      |      |      |      |      |      |      |      |      |    |
|-----------------------|-----------------------|-----------------------|-----------------------|-----------------------|-----------------------|-----------------------|-----------------------|-----------------------|------------------------|------------------------|-----------|------------------|------------|------|------|------|------|------|------|------|------|------|------|------|------|------|------|------|------|------|------|------|------|------|------|------|------|------|----|
| 1                     | 2                     | 3                     | 4                     | 5                     | 6                     | 7                     | 8                     | 9                     | 10                     | 11                     | 12        | 13               | 14         | 15   | 16   | 17   | 18   | 19   | 20   | 21   | 22   | 23   | 24   | 25   | 26   | 27   | 28   | 29   | 30   | 31   | 32   | 33   | 34   | 35   | 36   | 37   | 38   | 39   | 40 |
| 1.00                  | 1.00                  | 0.75                  | 0.25                  | 0.00                  | 1.00                  | 0.00                  | 1.00                  | 1.00                  | 1.00                   | 1.00                   | 1.00      | 0.83             | 1.00       | 0.33 | 0.00 | 0.82 | 0.71 | 1.00 | 0.83 | 0.80 | 0.27 | 0.00 | 0.09 | 0.91 | 0.73 | 0.09 | 1.00 | 1.00 | 0.00 | 0.80 | 0.27 | 0.00 | 0.00 | 1.00 | 0.50 | 0.91 | 0.27 | 0.30 |    |
| DF5019-1_06-23-03.mov | DF5019-2_06-24-03.mov | DF5019-3_06-24-03.mov | DF5019-4_06-24-03.mov | DF5019-5_06-24-03.mov | DF5019-6_08-22-05.mov | DF5019-7_08-22-05.mov | DF5019-8_08-22-05.mov | DF5019-9_08-22-05.mov | DF5019-10_08-22-05.mov | DF5019-11_08-22-05.mov | frequency | DF5019 signature | datapoints |      |      |      |      |      |      |      |      |      |      |      |      |      |      |      |      |      |      |      |      |      |      |      |      |      |    |

|                       |                       |                       |                       |                       |                       |                       |                       |                       |                        |                        |                        |           |                  |            |      |      |      |      |      |      |      |      |      |      |      |      |      |      |      |      |      |      |      |      |      |      |      |      |    |
|-----------------------|-----------------------|-----------------------|-----------------------|-----------------------|-----------------------|-----------------------|-----------------------|-----------------------|------------------------|------------------------|------------------------|-----------|------------------|------------|------|------|------|------|------|------|------|------|------|------|------|------|------|------|------|------|------|------|------|------|------|------|------|------|----|
| 1                     | 2                     | 3                     | 4                     | 5                     | 6                     | 7                     | 8                     | 9                     | 10                     | 11                     | 12                     | 13        | 14               | 15         | 16   | 17   | 18   | 19   | 20   | 21   | 22   | 23   | 24   | 25   | 26   | 27   | 28   | 29   | 30   | 31   | 32   | 33   | 34   | 35   | 36   | 37   | 38   | 39   | 40 |
| 1.00                  | 1.00                  | 0.75                  | 0.75                  | 0.00                  | 1.00                  | 1.00                  | 1.00                  | 1.00                  | 1.00                   | 1.00                   | 1.00                   | 1.00      | 0.67             | 0.00       | 0.50 | 1.00 | 0.38 | 0.85 | 1.00 | 1.00 | 0.70 | 1.00 | 0.25 | 0.82 | 0.00 | 1.00 | 0.00 | 1.00 | 0.00 | 1.00 | 0.82 | 0.00 | 0.08 | 1.00 | 1.00 | 0.92 | 0.17 | 0.80 |    |
| DF5020-1_05-29-03.mov | DF5020-2_05-29-03.mov | DF5020-3_05-29-03.mov | DF5020-4_05-29-03.mov | DF5020-5_05-29-03.mov | DF5020-6_06-21-05.mov | DF5020-7_06-21-05.mov | DF5020-8_06-21-05.mov | DF5020-9_06-21-05.mov | DF5020-10_06-21-05.mov | DF5020-11_06-21-05.mov | DF5020-12_06-21-05.mov | frequency | DF5020 signature | datapoints |      |      |      |      |      |      |      |      |      |      |      |      |      |      |      |      |      |      |      |      |      |      |      |      |    |









Table with columns for character number (1-40) and rows for character number and frequency. Includes sub-sections for character number and frequency, and data points for character number and frequency.
