# Supplementary material
Source: PubMed Central journal article supplement (PMC2763944)
Supplement: NIHMS143764-supplement-10.pdf [file NIHMS143764-supplement-10.pdf]

**Table S2.** Complete list of the 75 statistically significant dependencies between pairs of characters determined with the correlated changes test implemented in MacClade (Maddison & Maddison 1989)

character numbers correspond to the character numbers in Fig. 2 and Fig. S1

| character |                                                                  | MacClade<br>p-Value: | dependent character |                                                       | mutual<br>dependency: |
|-----------|------------------------------------------------------------------|----------------------|---------------------|-------------------------------------------------------|-----------------------|
| number:   | description:                                                     |                      | number:             | description:                                          |                       |
| 2         | if there is symmetric ruffling in the one-cell stage:            | 0.0067               | 11                  | there is no cytoplasmic posterior flow                | y                     |
|           |                                                                  | 0.018                | 17                  | the PN meet in the middle                             | y                     |
|           |                                                                  | 0.0227               | 31                  | there is no ruffling at the two-cell stage            | y                     |
| 3         | if there is no anterior PB:                                      | 0.045                | 2                   | there is no asymmetric ruffling                       | n                     |
|           |                                                                  | 0.002                | 5                   | there is a PB in the posterior                        | y                     |
|           |                                                                  | 0.017                | 6                   | there is only one PN                                  | y                     |
|           |                                                                  | 0.012                | 7                   | there are detached centrosomes                        | n                     |
|           |                                                                  | 0.033                | 11                  | there is no cytoplasmic posterior flow                | y                     |
|           |                                                                  | 0.017                | 13                  | there is no anterior PN migration                     | y                     |
|           |                                                                  | 0.013                | 20                  | there is no spindle rotation                          | n                     |
|           |                                                                  | 0.0031               | 33                  | there are PC-like constrictions at the two-cell stage | y                     |
| 5         | if there is a posterior PB:                                      | 0.002                | 3                   | there is no anterior PB                               | y                     |
|           |                                                                  | 0.045                | 11                  | there is no cytoplasmic posterior flow                | y                     |
|           |                                                                  | 0.021                | 13                  | there is no anterior PN migration                     | y                     |
|           |                                                                  | 0.0127               | 27                  | the nuclei touch the cytokinesis plate                | y                     |
| 6         | if there is only one PN:                                         | 0.043                | 3                   | there is no anterior PB                               | y                     |
|           |                                                                  | 0.0013               | 7                   | there are detached centrosomes                        | n                     |
| 8         | if there is no PC:                                               | 0.01                 | 3                   | there is no anterior PB                               | n                     |
|           |                                                                  | 0.0093               | 11                  | there is no cytoplasmic posterior flow                | y                     |
|           |                                                                  | 0.001                | 13                  | there is no anterior PN migration                     | y                     |
|           |                                                                  | 0.024                | 20                  | there is no spindle rotation                          | n                     |
| 11        | if there is no cytoplasmic posterior flow:                       | 0.0047               | 2                   | there is no asymmetric ruffling in the one-cell stage | y                     |
|           |                                                                  | 0.01                 | 3                   | there is no anterior PB                               | y                     |
|           |                                                                  | 0.0027               | 5                   | there is a PB in the posterior                        | y                     |
|           |                                                                  | 0.041                | 8                   | there is no PC                                        | y                     |
|           |                                                                  | 0.042                | 13                  | there is no anterior PN migration                     | y                     |
|           |                                                                  | 0.0067               | 17                  | the PN meet in the middle                             | y                     |
| 12        | if there is no cortical anterior flow:                           | 0.018                | 2                   | there is no asymmetric ruffling in the one-cell stage | n                     |
|           |                                                                  | 0.025                | 5                   | there is a PB in the posterior                        | n                     |
|           |                                                                  | 0.018                | 8                   | there is no PC                                        | n                     |
|           |                                                                  | 0.001                | 11                  | there is no cytoplasmic posterior flow                | n                     |
|           |                                                                  | 0.025                | 17                  | the PN meet in the middle                             | n                     |
| 13        | if the anterior pronucleus doesn't migrate:                      | 0.025                | 3                   | there is no anterior PB                               | y                     |
|           |                                                                  | 0.025                | 5                   | there is a PB in the posterior                        | y                     |
|           |                                                                  | 0.0127               | 8                   | there is no PC                                        | y                     |
|           |                                                                  | 0.018                | 11                  | there is no cytoplasmic posterior flow                | y                     |
| 14        | if there is no pronuclear migration of the posterior pronucleus: | 0.041                | 1                   | there is no membrane ruffling in the one-cell stage   | n                     |
|           |                                                                  | 0.015                | 22                  | there is no anterior rocking                          | y                     |
| 16        | if there are clear areas at the two-cell stage                   | 0.006                | 27                  | the nuclei touch the cytokinesis plate                | y                     |
|           |                                                                  | 0.002                | 31                  | there is no ruffling at the two-cell stage            | y                     |

| character |                                                              | MacClade<br>p-Value: | dependent character |                                                              | mutual<br>dependency: |
|-----------|--------------------------------------------------------------|----------------------|---------------------|--------------------------------------------------------------|-----------------------|
| number:   | description:                                                 |                      | number:             | description:                                                 |                       |
| 17        | if the pronuclei meet<br>in the middle:                      | 0.012                | 2                   | there is symmetric ruffling in the one-cell stage            | y                     |
|           |                                                              | 0.021                | 5                   | there is a PB in the posterior                               | n                     |
|           |                                                              | 0.006                | 11                  | there is no cytoplasmic flow to the posterior                | y                     |
|           |                                                              | 0.02                 | 14                  | there is no posterior PN migration                           | n                     |
|           |                                                              | 0.028                | 27                  | the nuclei touch the cytokinesis plate                       | n                     |
|           |                                                              | 0.014                | 31                  | there is no ruffling at the two-cell stage                   | y                     |
| 18        | if NEBD is not in the center:                                | 0.034                | 39                  | there is AB spindle rocking                                  | y                     |
| 22        | if the anterior spindle<br>pole rocks:                       | 0.015                | 14                  | the posterior pronucleus migrates                            | y                     |
|           |                                                              |                      |                     |                                                              |                       |
| 23        | if the posterior spindle<br>pole rocks:                      | 0.0073               | 22                  | the anterior spindle pole rocks                              | n                     |
| 26        | if the nuclei don't move:                                    | 0.045                | 2                   | there is no asymmetric ruffling                              | n                     |
|           |                                                              | 0.048                | 5                   | there is a PB in the posterior                               | n                     |
|           |                                                              | 0.045                | 17                  | the PN meet in the middle                                    | n                     |
|           |                                                              | 0.041                | 31                  | there is no ruffling at the two-cell stage                   | n                     |
| 27        | if the nuclei touch the<br>cytokinetic plate:                | 0.012                | 5                   | there is a PB in the posterior                               | y                     |
|           |                                                              | 0.0033               | 16                  | there are areas clear of yolk granules in the two-cell stage | y                     |
|           |                                                              | 0.012                | 31                  | there is no ruffling at the two-cell stage                   | y                     |
| 30        | if there are vacuoles:                                       | 0.027                | 34                  | the cell cycles are not asynchronous                         | n                     |
| 31        | if there is no ruffling<br>at the two-cell stage:            | 0.0047               | 2                   | there is no asymmetric ruffling at the one-cell stage        | y                     |
|           |                                                              | 0.037                | 11                  | there is no cytoplasmic posterior flow                       | n                     |
|           |                                                              | 0.0013               | 16                  | there are areas clear of yolk granules in the two-cell stage | y                     |
|           |                                                              | 0.006                | 17                  | the PN meet in the middle                                    | y                     |
|           |                                                              | 0.014                | 27                  | the nuclei touch the cytokinetic plate                       | y                     |
| 32        | if there is asymmetric<br>ruffling at the two-cell stage:    | 0.049                | 19                  | NEBD happens before the spindle set up                       | n                     |
|           |                                                              | 0.016                | 21                  | there is a spindle shift                                     | n                     |
| 33        | if there are PC-like<br>constrictions:                       | 0.004                | 3                   | there is no anterior PB                                      | y                     |
|           |                                                              | 0.049                | 8                   | there is no PC                                               | n                     |
|           |                                                              | 0.041                | 13                  | there is no anterior PN migration                            | n                     |
|           |                                                              | 0.002                | 38                  | the P2 cell does not immediately touch the AB lineage        | y                     |
| 35        | if P1 divides before AB:                                     | 0.0067               | 6                   | there is only one PN                                         | n                     |
|           |                                                              | 0.015                | 7                   | there are detached centrosomes                               | n                     |
| 38        | if the P2 cell does not<br>immediately touch the AB lineage: | 0.018                | 6                   | there is only one PN                                         | n                     |
|           |                                                              | 0.022                | 7                   | there are detached centrosomes                               | n                     |
|           |                                                              | 0.017                | 20                  | there is no spindle rotation                                 | n                     |
|           |                                                              | 0.006                | 33                  | there are PC-like constrictions at the two-cell stage        | y                     |
| 39        | if the AB spindle rocks:                                     | 0.038                | 18                  | NEBD is not in the center                                    | y                     |

Abbreviations used:

**NEBD** Nuclear Envelope Breakdown  
**PB** Polar body  
**PC** Pseudo-cleavage  
**PN** Pronucleus, Pronuclei
